# Supplementary material for: Screening, Identification and Efficacy Evaluation of Antagonistic Bacteria for Biocontrol of Soft Rot Disease Caused by Dickeya zeae
Source: PubMed Central journal article supplement (PMC7285164; doi:10.3390/microorganisms8050697), 2020-05-09
Supplement: microorganisms-08-00697-s001.pdf [file microorganisms-08-00697-s001.pdf]

## Supplemental material

# Screening, Identification and Efficacy Evaluation of Antagonistic Bacteria for Biocontrol for Soft Rot Disease Caused by *Dickeya zeae*

Jieling Li<sup>1,†</sup>, Ming Hu<sup>1,†</sup>, Yang Xue<sup>1</sup>, Xia Chen<sup>1</sup>, Guangtao Lu<sup>2</sup>, Lianhui Zhang<sup>1</sup>, Jianuan Zhou<sup>1,\*</sup>

<sup>1</sup> Guangdong Laboratory for Lingnan Modern Agriculture, Guangdong Province Key Laboratory of Microbial Signals and Disease Control, Integrative Microbiology Research Centre, South China Agricultural University, Guangzhou 510642, China

<sup>2</sup> State Key Laboratory for Conservation and Utilization of Subtropical Agro-bioresources, College of Life Science and Technology, Guangxi University, Nanning 530004, China

\* Correspondence: jianuanzhou@scau.edu.cn

† These authors contributed equally to this work

**Content:**

**Figure S1.**

**Figure S2**

**Figure S3**

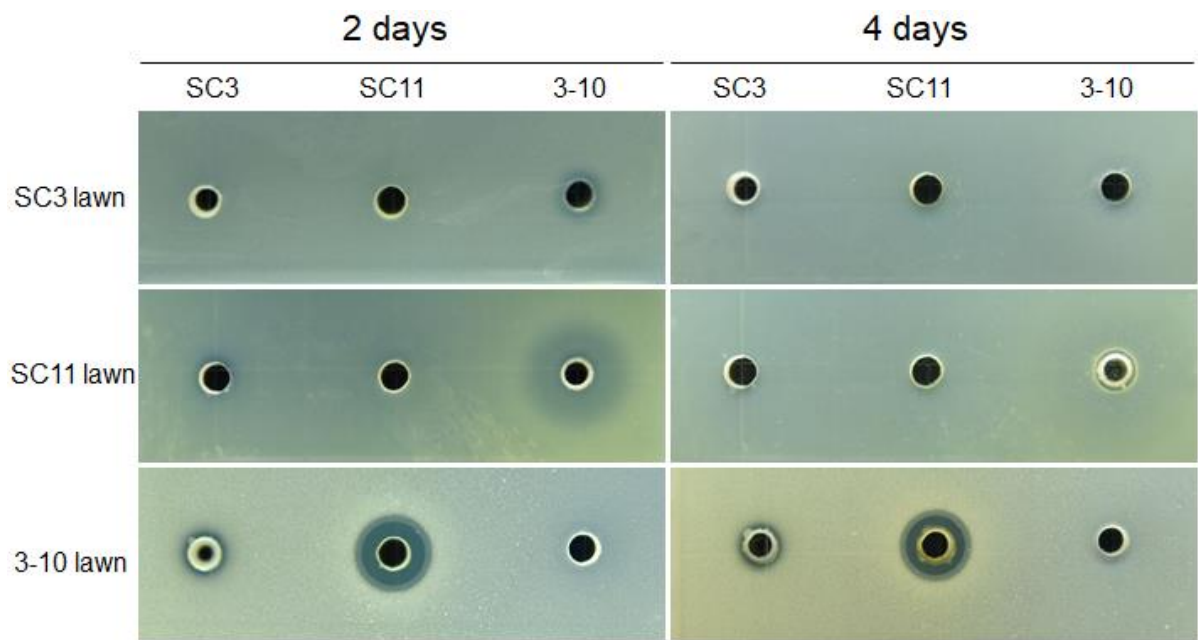

**Figure 1. Inhibitory activities of strains SC3, SC11 and 3-10 against the growth of strains SC3 and SC11 in spot-on-lawn assay.**

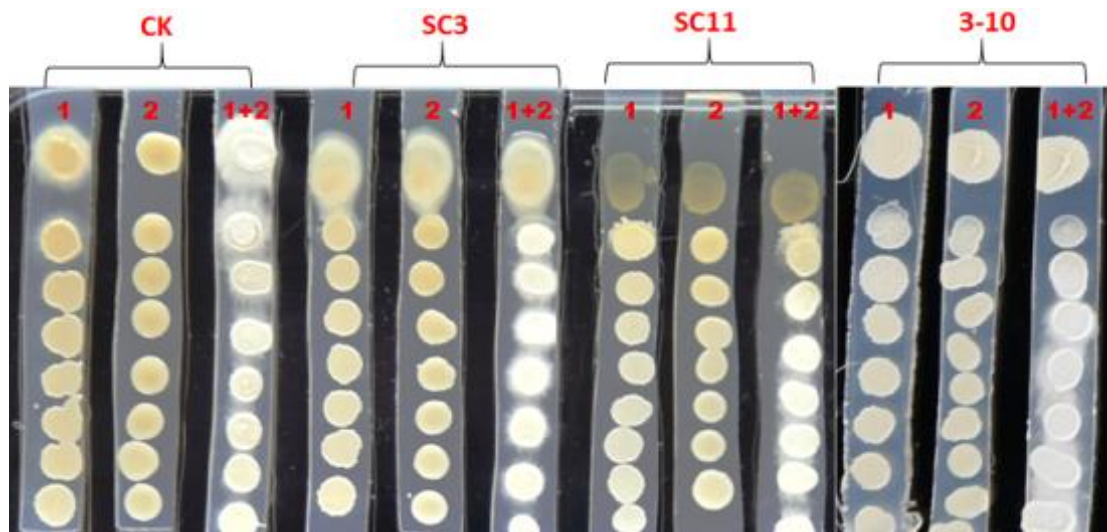

**Figure S2. Inhibitory activities of strains SC3, SC11 and 3-10 against the sexual mating of *Sporisorium scitamineum*.** PDA plate was cut into separated slices (0.6 cm in width). An aliquot of 1  $\mu$ L overnight bacterial culture was added on one end of the agar slice, and then the mixture of *S. scitamineum* haploid cells MAT1 and MAT2 was spotted (0.5  $\mu$ L of  $OD_{600} \approx 1.5$ ) on the slice at progressively further distances from the loaded sample. LB medium was added in the same way in place of bacterial culture as a negative control. The plates were incubated at 28  $^{\circ}$ C for 2 days, until the white hypha in the negative control grew to reach the edges of the slice. 1, MAT1; 2, MAT2; 1+2, mixture of haploid cells MAT1 and MAT2.

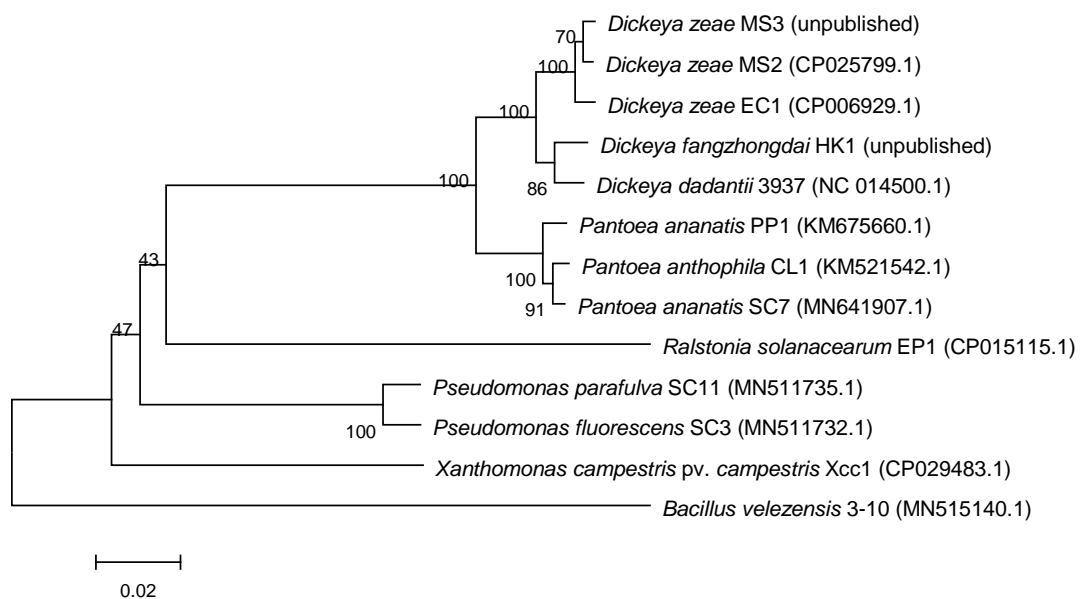

**Figure S3. Phylogenetic tree based on the concatenated nucleotide sequences of the 16S rRNA gene of bacterial strains used in this study.** Consensus sequences of the 16S rRNA gene were aligned with ClustalW and trimmed in the same size and assembled to construct a Neighbor-joining tree. Bootstrap values after 1000 replicates are expressed as percentages.
